# Supplementary material for: The σ70 region 1.2 regulates promoter escape by unwinding DNA downstream of the transcription start site
Source: PubMed Central journal article supplement — Nucleic Acids Res. 2013 Feb 20;41(8):4565–72. doi: 10.1093/nar/gkt116 (PMC3632114; doi:10.1093/nar/gkt116), 2013-02-20

**Supplementary Figure 1.** M13ori promoter derivatives used in our study. +1TSS on the template strand is red, mutations are green.

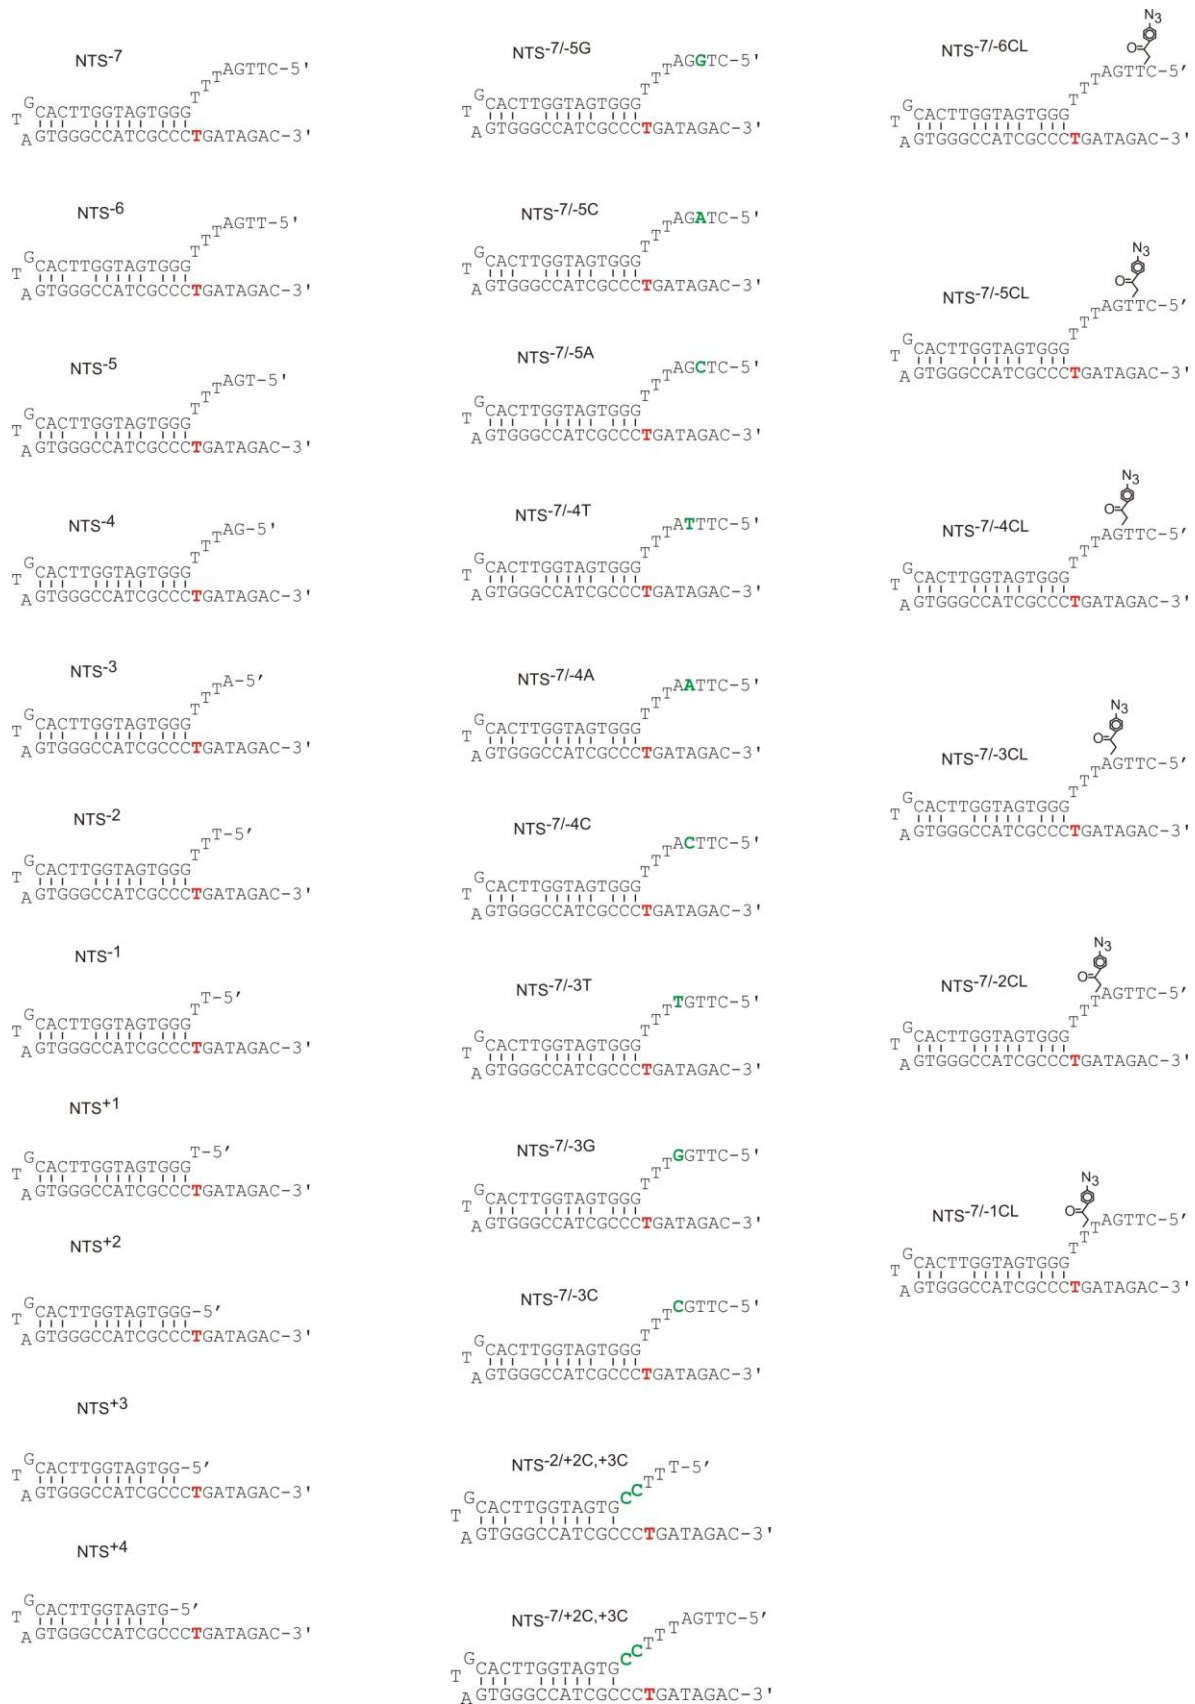

**Supplementary Figure 2. A.** Activity of APAB modified NTS<sup>-7</sup> promoters in transcription. An extra band in the middle of the gel originates from transcription on a shorter DNA fragment contaminating phosphorothiolated oligos. **B.** UV-induced DNA/protein cross-link with Eσ<sup>70</sup> on radiolabeled NTS<sup>-7/-4CL</sup> before and after NTPs addition.

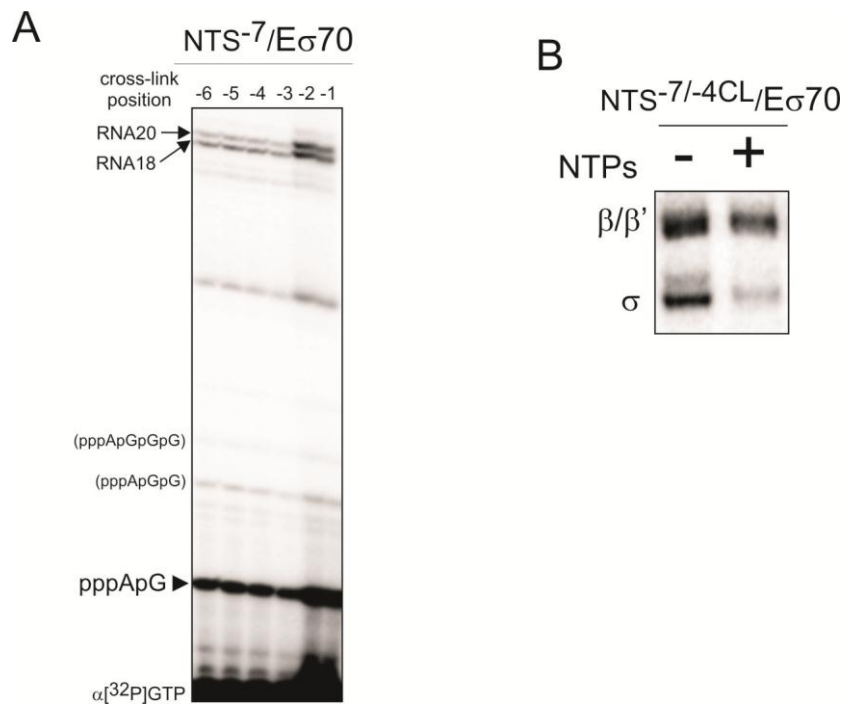

Supplement: supp_gkt116_nar-00128-v-2013-File005.pdf [file supp_gkt116_nar-00128-v-2013-File005.pdf]
